# Supplementary material for: Association between mean corpuscular volume and severity of coronary artery disease in the Northern Chinese population: a cross-sectional study
Source: PubMed Central journal article supplement — J Int Med Res. 2020 Mar 30;48(3):0300060519896713. doi: 10.1177/0300060519896713 (PMC7133409; doi:10.1177/0300060519896713), 2020-03-30
Supplement: IMR896713_Supplemental_Table1.pdf [file IMR896713_Supplemental_Table1.pdf]

Supplement Table 1 Multiple linear regression analysis for Gensini score stratified by smoking status

| Multivariate adjusted |                           |        |
|-----------------------|---------------------------|--------|
| <b>Smoker</b>         | $\beta$ (95% CI)          | P      |
| MCV                   | 0.867 (0.470 to 1.265)    | <0.001 |
| RDW                   | 1.402 (0.734 to 2.071)    | <0.001 |
| RBC                   | -1.340 (-2.699 to 0.020)  | 0.053  |
| Ht                    | -0.215 (-0.408 to -0.021) | 0.030  |
| HCT                   | -0.728 (-1.426 to -0.031) | 0.041  |
| <b>Non-Smoker</b>     | $\beta$ (95% CI)          | P      |
| MCV                   | 0.036 (-0.412 to 0.484)   | 0.875  |
| RDW                   | 0.316 (-0.310 to 0.942)   | 0.322  |
| RBC                   | 0.632 (0.201 to 1.063)    | 0.004  |
| Ht                    | 0.099 (-0.073 to 0.272)   | 0.260  |
| HCT                   | 0.250 (-0.361 to 0.860)   | 0.422  |

Multivariate adjusted by age, sex, hypertension, diabetes mellitus and heart rate
